# Supplementary material
Source: MDPI journal article supplement (https://www.mdpi.com/2673-8945/3/1/2)
Supplement: s1 [file s1]

Comparative Analysis Between Suisse and Basque Dwelling Minimum Typologies

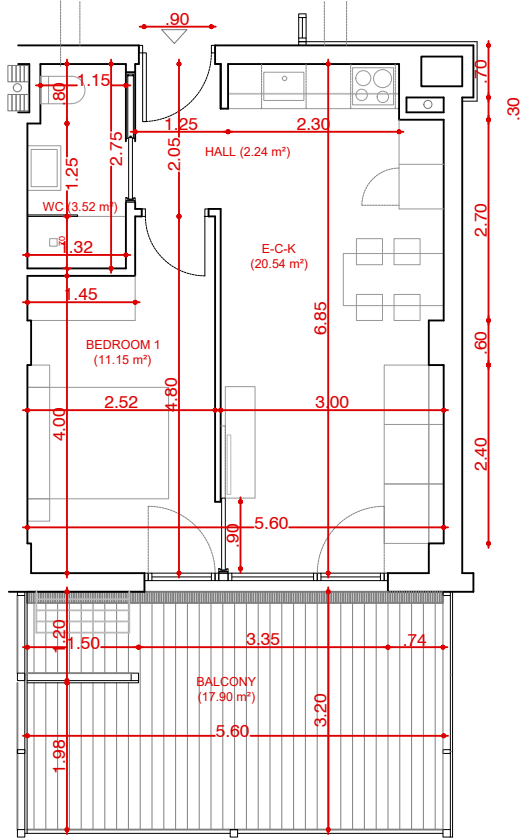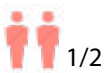

1/2

AD type I-1D, Scale: 1/100  
Project IRUN ONAURRE, SATIE Arquitectos 2021  
Useful surface: 37.45 m2

Surface per person (m2)

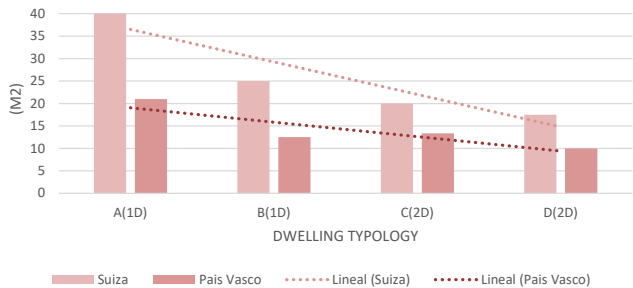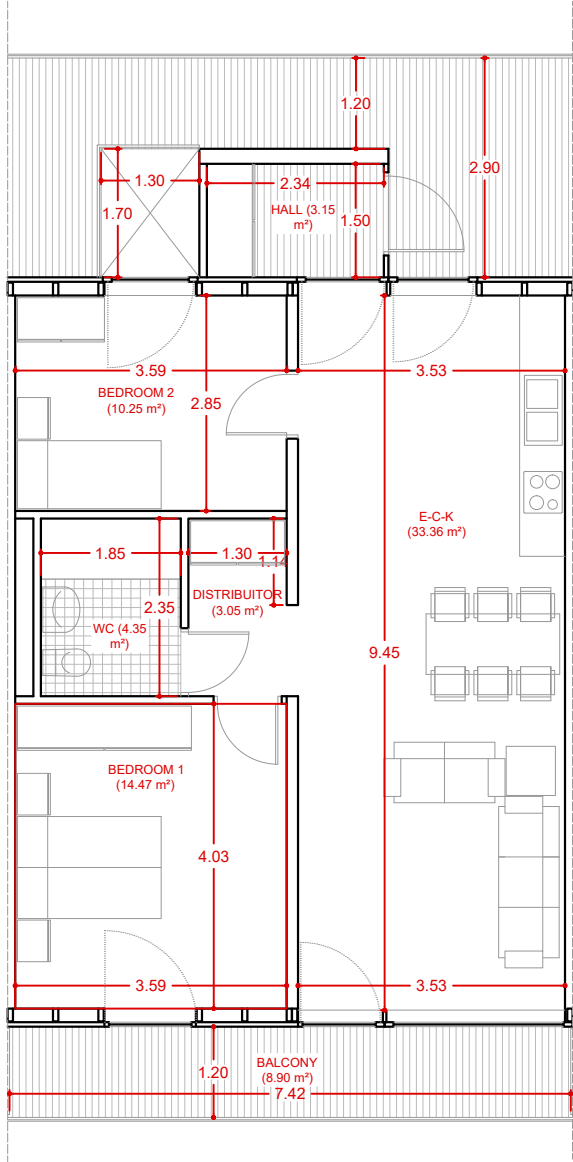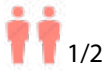

1/2

Social housing type I-1D, Scale:1/100  
Project LAUFENBURG, Sumi & Burkhalter 1996  
Useful surface: 68.63 m2

SURFACE PER DWELLING, CAPV 2020 [M2]

| TYPE       | A  | B    | C     | D  | E | F | G | H |
|------------|----|------|-------|----|---|---|---|---|
| PPM        | 1  | 2    | 3     | 4  | 5 | 6 | 7 | 8 |
| S.net.min  | 25 | 25   | 40    | 40 | - | - | - | - |
| S.net.max  | 25 | 40   | 60    | 60 | - | - | - | - |
| m2/P [min] | 25 | 12.5 | 13.33 | 10 | - | - | - | - |

SURFACE PER DWELLING, SWITZERLAND [M2]

| TYPE       | A  | B  | C  | D    | E  | F  | G     | H     |
|------------|----|----|----|------|----|----|-------|-------|
| PPM        | 1  | 2  | 3  | 4    | 5  | 6  | 7     | 8     |
| S.net.min  | 40 | 50 | 60 | 70   | 80 | 90 | 100   | 110   |
| S.net.max  | 40 | 55 | 66 | 77   | 88 | 99 | 110   | 121   |
| m2/P [min] | 40 | 25 | 20 | 17.5 | 16 | 15 | 14.29 | 13.75 |

Surface per person (m2)

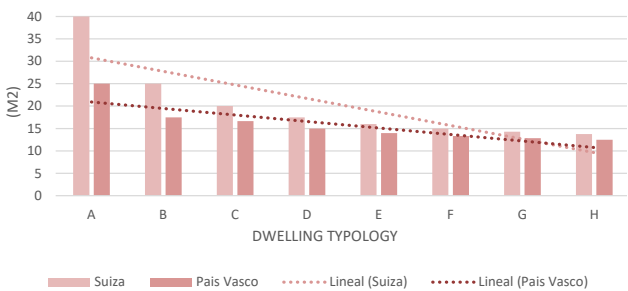

Minimun surfaces (VPO)

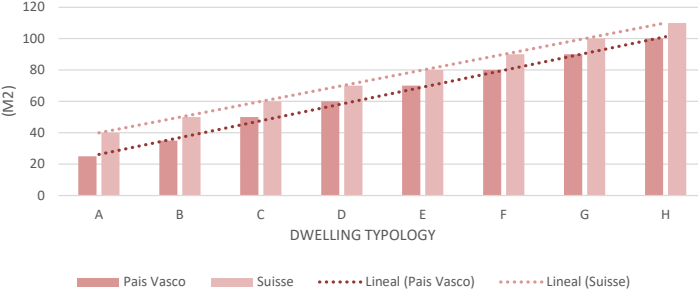

## 34 AD's in Irun

**Location:** Calle Jostun, Irun, Gipuzcoa, Spain.

**Year of construction:** 2017

**Use:** Public Housing

**Architect:** SATIE Arquitectos

**Total surface:** 2.772'1 m<sup>2</sup>

**Number of floors:** 5

**Number of floors underground:** 1

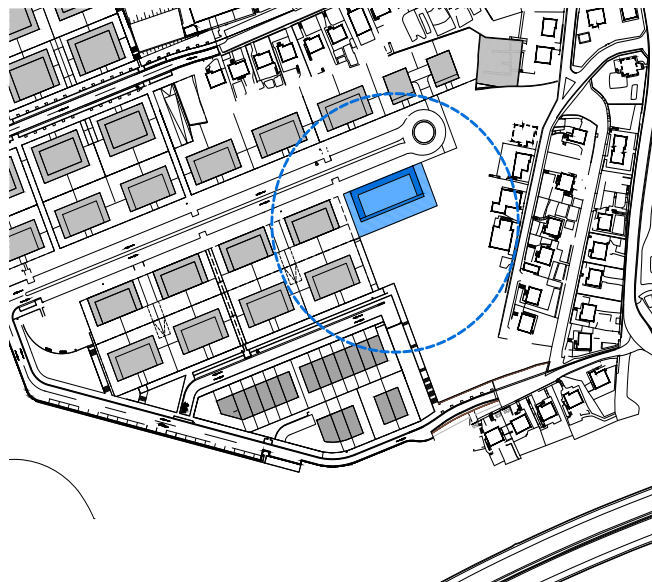

Site plan, Scale:1/40.000

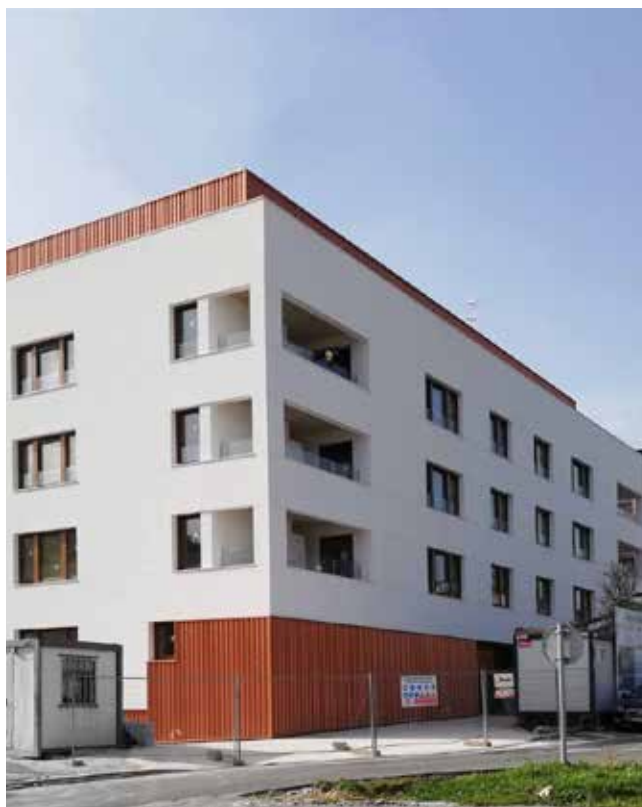

Authors

| DWELLING TYPOLOGY |    |      |    |       |
|-------------------|----|------|----|-------|
|                   | PB | P1-3 | P4 | TOTAL |
| TYPE I-1D         | 4  | 12   | 2  | 18    |
| TYPE II-1D        | 0  | 12   | 0  | 12    |
| TYPE III-PMR      | 2  | 0    | 0  | 2     |
| TYPE IV-2D        | 0  | 0    | 2  | 2     |
|                   |    |      |    | 34    |

| SURFACE PER FLOORS (M2) |        |        |        |         |
|-------------------------|--------|--------|--------|---------|
|                         | GF     | P1-5   | P6     | TOTAL   |
| Private sf              | 97.9   | 353.9  | 236.9  | 2812.1  |
| Comun sf                | 314.43 | 54.98  | 54.98  | 644.31  |
| Useful sf               | 412.33 | 408.88 | 291.88 | 2748.61 |
| Constr. sf              | 477.5  | 477.5  | 477.5  | 3342.5  |

| COMUN AREAS   |        | TOTAL                  |         |
|---------------|--------|------------------------|---------|
| Porche GF     | 106.97 | Useful sf              | 1926.22 |
| Bikes         | 73.7   | Constr. sf             | 2773.1  |
| Locals        | 55.7   | Rend c/u               | 1.44    |
| Waste storage | 0      | Private sf of dwelling | 1415.1  |
| Office        | 0      | Comun sf               | 511.12  |
| Washing room  | 0      | Ratio pv/com           | 2.77    |
| Staircase     | 104.25 | People                 |         |
| Distributor   | 153    | OCUP. SI               | 70.76   |

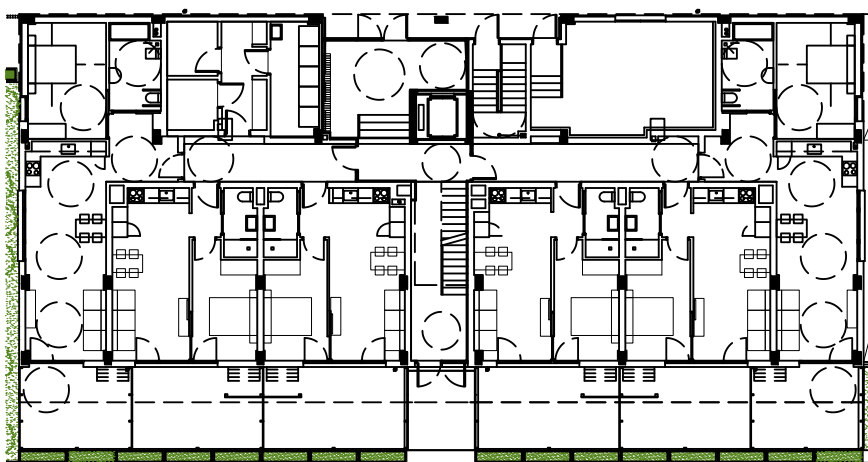

Ground floor (GF), Scale:1/300

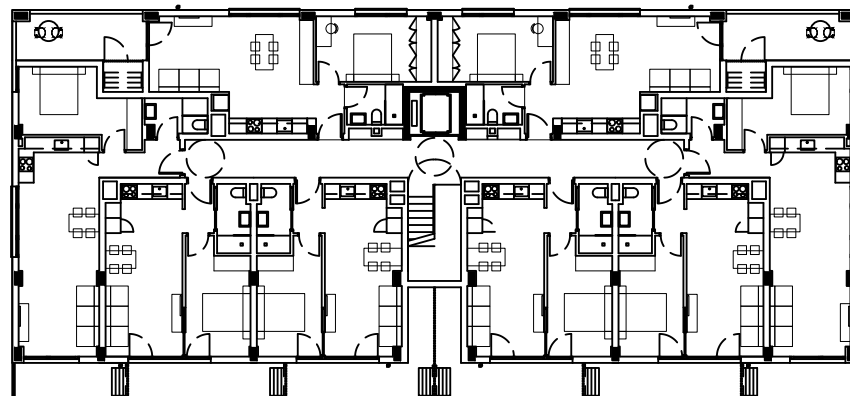

Floor 1-3, Scale:1/300

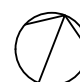

## Orientations

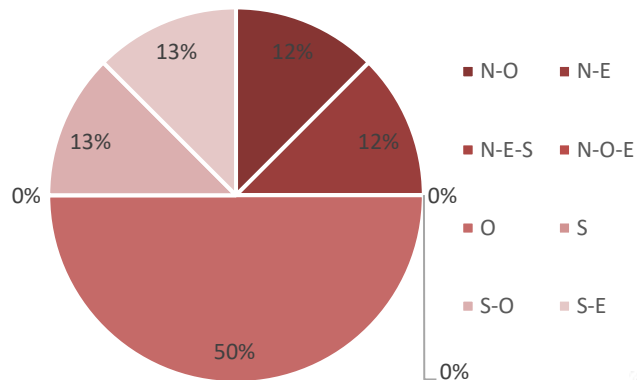

1/2

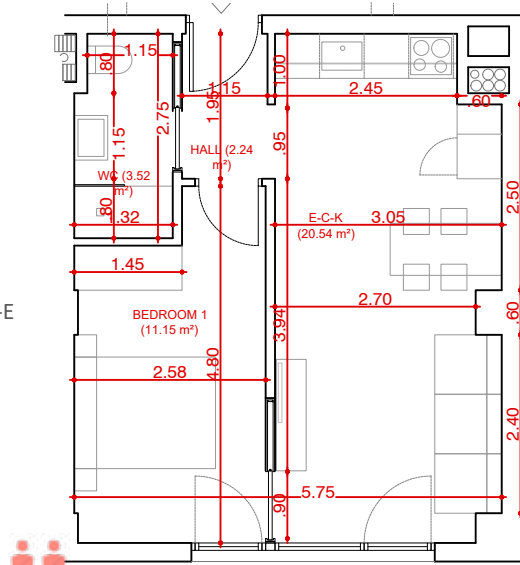

AD type I-1D, Scale:1/100

| SURFACE BY LIVING ROOM AND TYPE OF DWELLING (M2) |        |         |          |         |        |        |
|--------------------------------------------------|--------|---------|----------|---------|--------|--------|
|                                                  | TYPE I | TYPE II | TYPE III | TYPE IV | x SIMP | x POND |
| HALL                                             | 2.24   | 2.19    | 6.35     | 6.65    | -      | -      |
| WC                                               | 3.52   | 3.56    | 6.86     | 3.98    | -      | -      |
| BEDROOM 1                                        | 11.15  | 11.87   | 14.1     | 10.97   | -      | -      |
| BEDROOM 2                                        | 0      | 0       | 0        | 10.21   | -      | -      |
| ECK                                              | 20.54  | 25.42   | 27.7     | 25.44   | -      | -      |
| BALCONY                                          | -      | -       | -        | -       | -      | -      |
| Useful sf.                                       | 37.45  | 43.04   | 55.01    | 57.25   | 48.19  | 41.62  |
| Total useful sf                                  | 674.1  | 516.48  | 110.02   | 114.5   | 1415.1 | -      |
| Constr. sf.                                      | 2773.1 |         |          |         |        |        |

| OCCUPANCY RATIO |        |         |          |         |        |        |
|-----------------|--------|---------|----------|---------|--------|--------|
|                 | TYPE I | TYPE II | TYPE III | TYPE IV | x SIMP | x POND |
| N rooms         | 2      | 2       | 2        | 3       | -      | -      |
| PPM             | 2      | 2       | 2        | 3       | -      | -      |
| N/P≥1           | 1      | 1       | 1        | 1       | -      | -      |
| Indiv. space    | 14.67  | 15.43   | 20.96    | 25.16   | 19.06  | 15.93  |
| Ind.sp/P≥10     | 7.34   | 7.72    | 10.48    | 8.39    | 8.48   | 7.72   |
| Comun sp.       | 22.78  | 27.61   | 34.05    | 32.09   | 29.13  | 25.70  |
| Comun sp./P     | 11.39  | 13.81   | 17.03    | 10.70   | 13.23  | 12.53  |
| N modules K     | 6      | 5       | 7        | 8       | -      | -      |

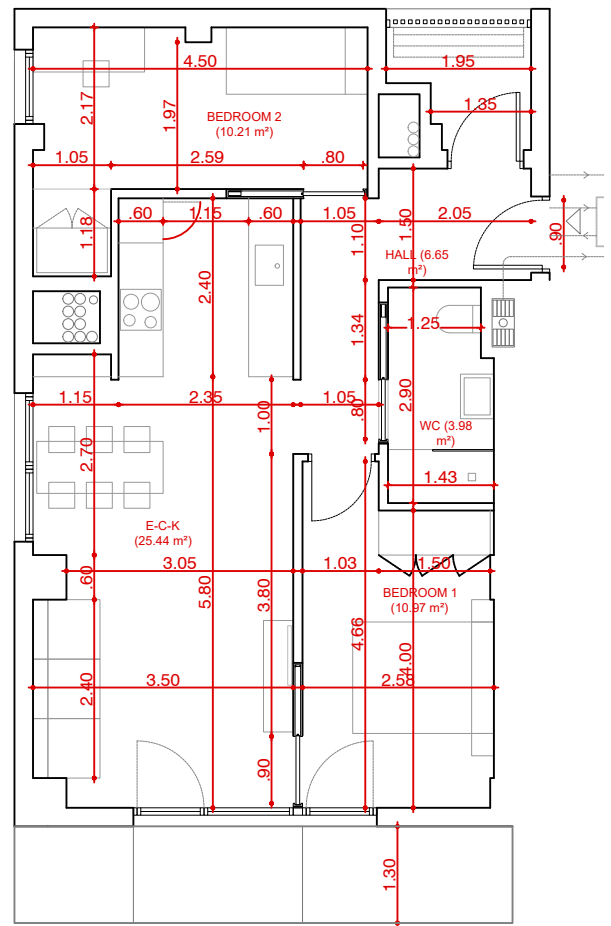

2/3

AD type IV, Scale:1/100

| OCCUPANCY RATIO |            |              |       |            |             |            |                |              |            |            |
|-----------------|------------|--------------|-------|------------|-------------|------------|----------------|--------------|------------|------------|
| N people        | N dwelling | Total people | (%)   | People/dw. | priv m2/per | com m2/per | total m2 t/per | balcony (m2) | balc. m2/p | total m2/p |
| 1               | 0          | 0            | 0     | -          | -           | -          | 0              | -            | -          | -          |
| 2               | 32         | 64           | 91.43 | -          | 20.32       | -          | 27.62          | -            | -          | -          |
| 3               | 2          | 6            | 8.57  | -          | 19.08       | -          | 26.39          | -            | -          | -          |
| 4               | 0          | 0            | 0     | -          | -           | -          | -              | -            | -          | -          |
|                 |            | 70           | 100   | 2.09       | 20.22       | 7.30       | 27.52          | 368.6        | 5.27       | 32.78      |
